# Supplementary material
Source: PubMed Central journal article supplement (PMC3376551)
Supplement: mmc1.pdf [file mmc1.pdf]

The American Journal of Human Genetics, Volume 90

## **Supplemental Data**

### **A Subset-Based Approach Improves Power and Interpretation for the Combined-Analysis of Genetic**

### **Association Studies of Heterogeneous Traits**

**Samsiddhi Bhattacharjee, Preetha Rajaraman, Kevin B. Jacobs, William A. Wheeler, Beatrice S. Melin, Patricia Hartge, GliomaScan Consortium, Meredith Yeager, Charles C. Chung, Stephen J. Chanock, and Nilanjan Chatterjee**

Figure 1

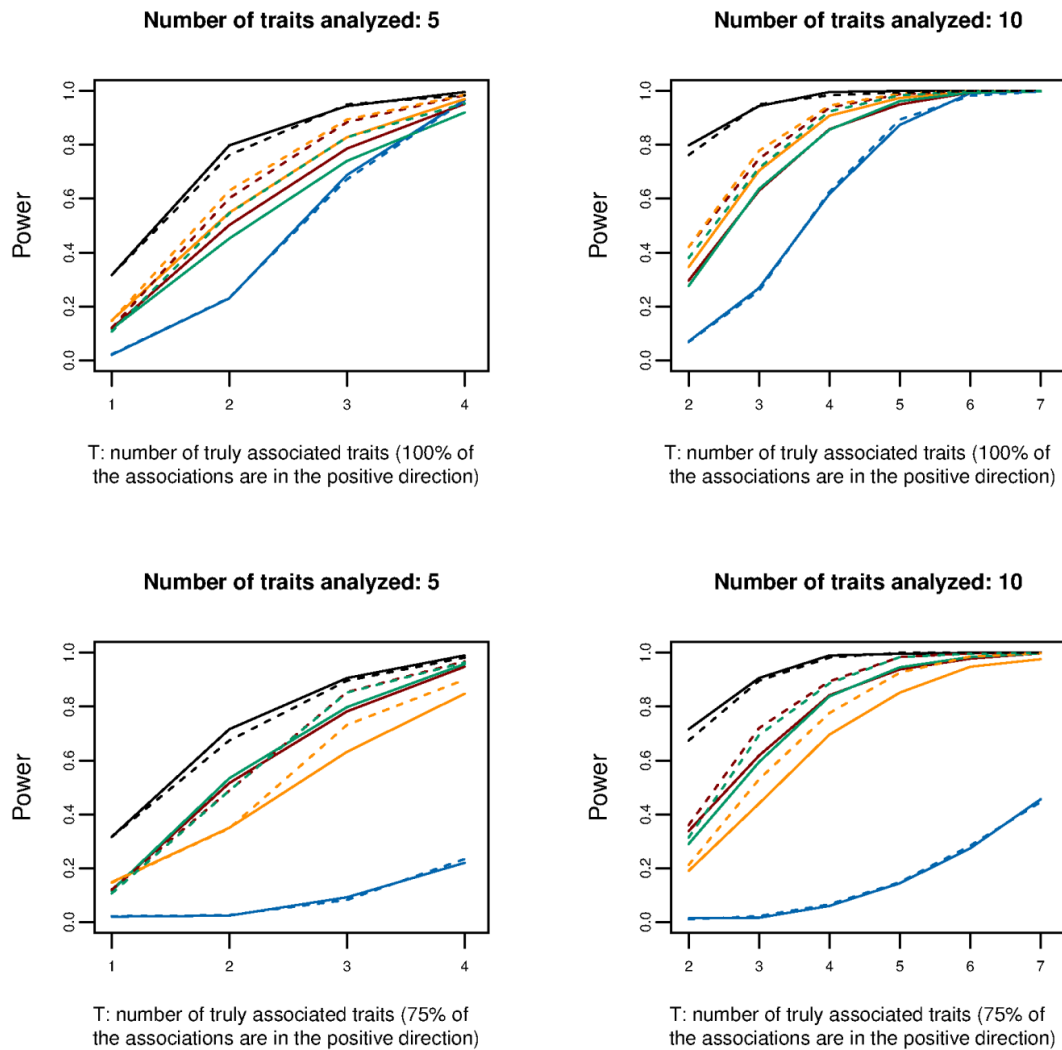

Figure S1. Simulation-Based Power Comparison of Alternative Methods for Detecting an Overall Association.

In each simulation, a total of  $K=5$  or  $K=10$  distinct traits are analyzed, each with 2000 cases and 2000 controls. A variant with  $MAF=0.3$  is assumed to be associated with a subset of the traits (the number of such traits is shown on the x-axis). The solid and dashed lines represent, respectively, power when all the OR-s for associated traits are fixed at a single value (1.15) (as in Figure 1) and power when the OR-s are allowed to vary around a fixed mean (1.15) within a given range (1.05-1.25; see Supplemental Methods, section 6 for details). The upper panel assumes that all of the associations are in the same direction and the lower panel assumes that 75% of the associations are positive and 25% are negative. In addition to two-sided (green lines) and one-sided (orange lines) subset-based tests, power curves are shown for standard meta-analysis (blue lines), Fisher's combined p-value method – a multi degree-of-freedom chi-square test (maroon line) and a “gold-standard” test (black lines) that assumes that the subset of the traits that are truly associated is known a priori. All powers are shown at a level of 0.001.

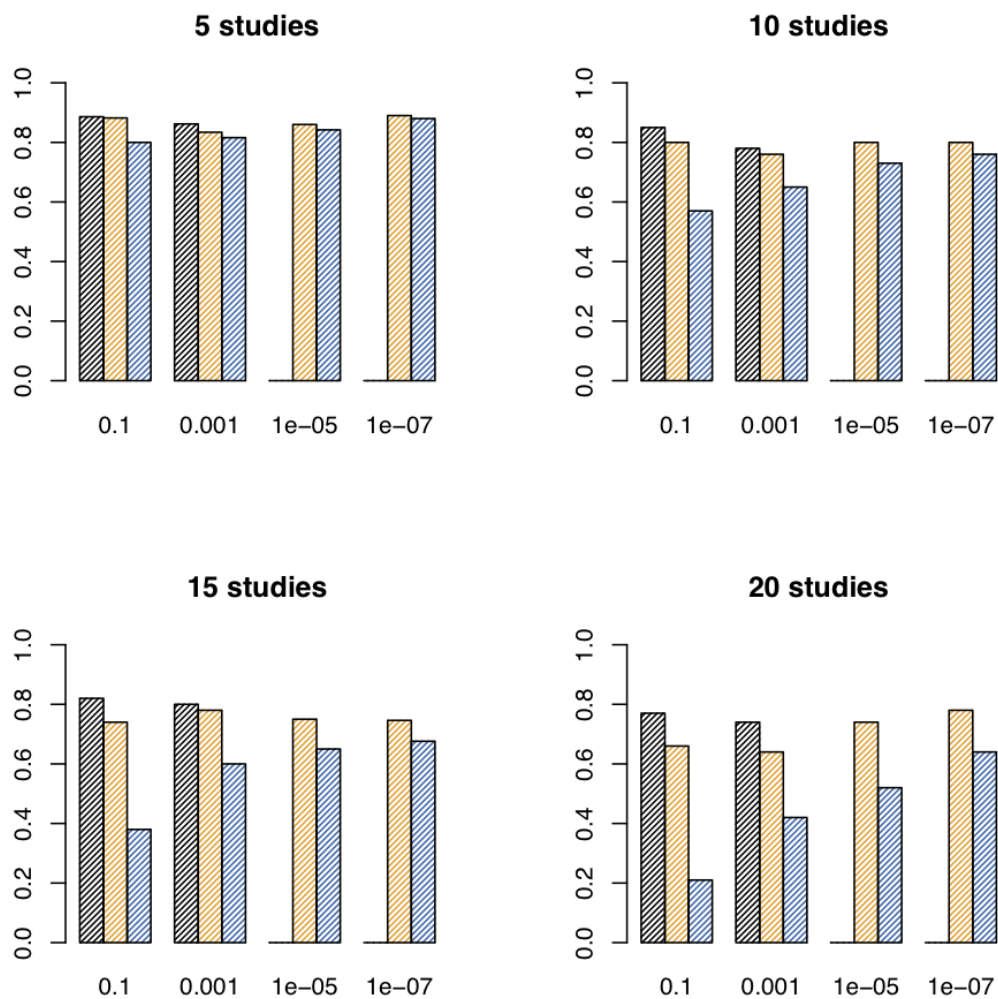

Figure S2. Simulation-Based Power Comparison of One-Sided Subset Search with Three Different p Value Estimation Procedures: Bonferroni (blue bars), DLM (orange bars) and Parametric Bootstrap (black bars)

The bootstrap method, which resamples effect size estimates for each study from a normal distribution with mean zero (assuming the null hypothesis of no association) and standard deviation equal to original standard error estimates, gives an “exact” method for computing p-values. In each simulation a total of K (5, 10, 15 or 20) distinct traits are analyzed, each with equal number of cases and controls. A variant with MAF=0.3 is assumed to be associated with a subset of size T (3, 6, or 10 or 12) traits with a fixed odds ratio of 1.15. Sample sizes were chosen such that the theoretical power of the gold-standard test (not shown) is close to 95%. The total sample sizes for all traits  $N$  and that for the subset of associated traits  $N_T$  were fixed as follows: 1)  $(N, N_T) = (5000, 3000)$ , 2)  $(N, N_T) = (10000, 6000)$ , 3)  $(N, N_T) = (15000, 9000)$  and 4)  $(N, N_T) = (20000, 12000)$  for power-comparison at levels  $\alpha = 0.1, 0.001, 10^{-5}$  and  $10^{-7}$  respectively. In each case, the DLM method performed superior to Bonferroni. The power of the Bootstrap method was computed only at the levels  $\alpha = 0.1$  and  $0.001$  (due to computational limitations), where it performed slightly better than DLM but considerably better than Bonferroni.

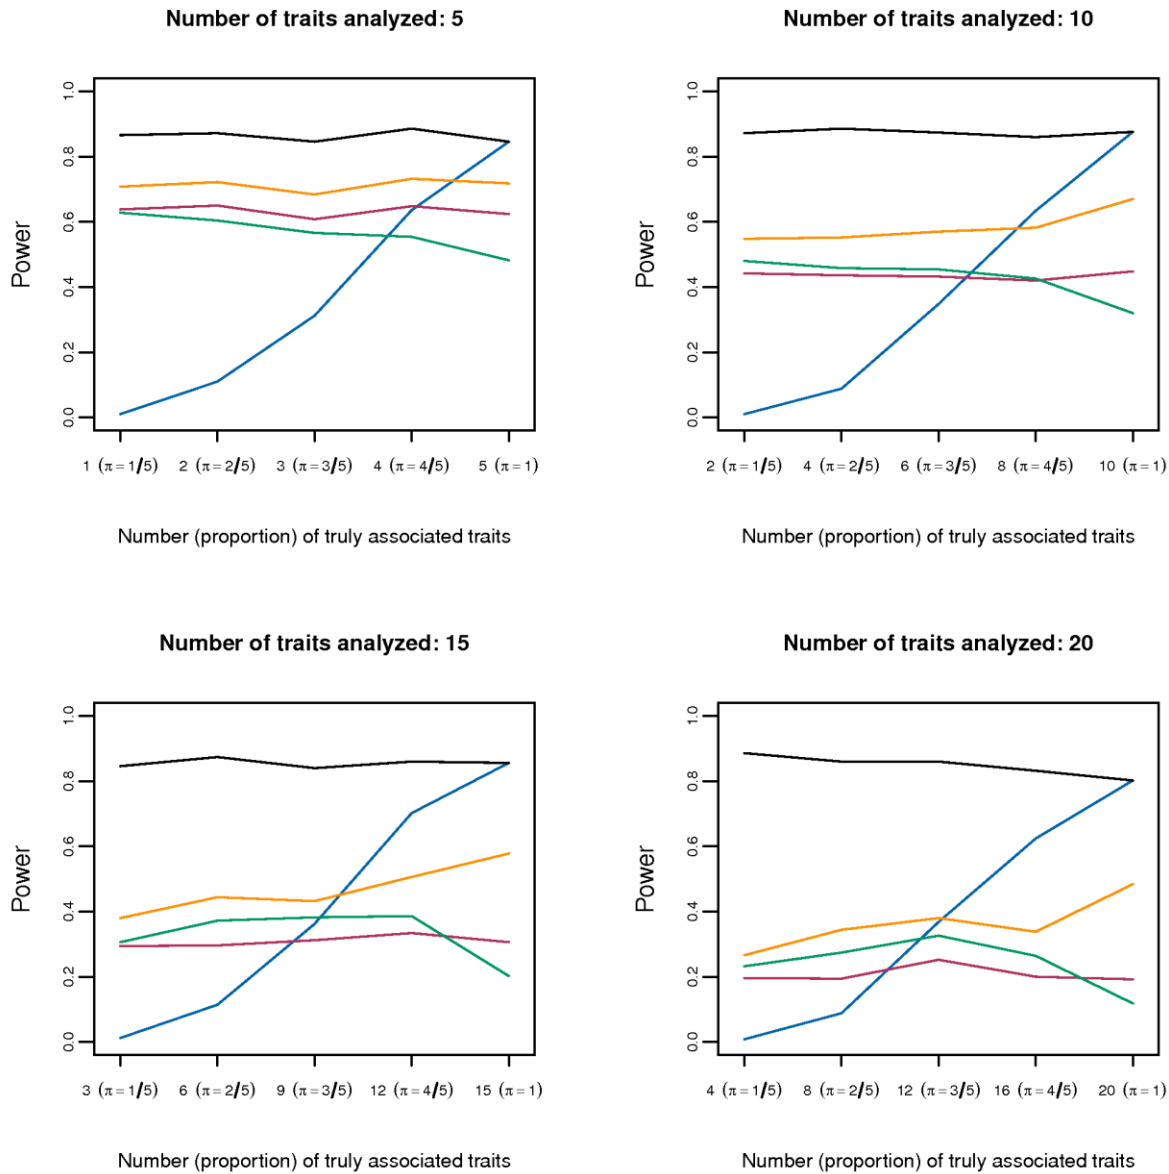

Figure S3. Simulation-Based Power Comparison for Combined Analysis of Heterogeneous Traits

In each simulation, a total of  $K$  ( $K=5, 10, 15$  and  $20$ ) independent case-control studies are analyzed each with equal number of cases and controls. A variant with  $MAF=0.3$  is assumed to be associated with a subset of the traits (non-null traits) with a fixed odds-ratio of 1.1. The number of non-null traits ( $T$ ) and the sample sizes for individual studies are varied such that the total number of cases/controls for associated traits is held fixed at  $M=10000$ , but the ratio  $\pi=M/N$ , the fraction of total sample size that contains a true association signal varies ( $\pi=1/5, 2/5, 3/5, 4/5$ , or  $1$ ). In addition to the two-sided (green line) and one-sided (orange line) subset-based tests, power curves are also shown for overall meta-analysis (blue line), Fisher's combined p-value method – a multi degree-of-freedom chi-square test (maroon line), and that for a “gold-standard” meta-analysis (black line) that assumes the subset of traits that are truly associated with the given SNP is known a priori. All powers are shown at a level of  $10^{-7}$ .

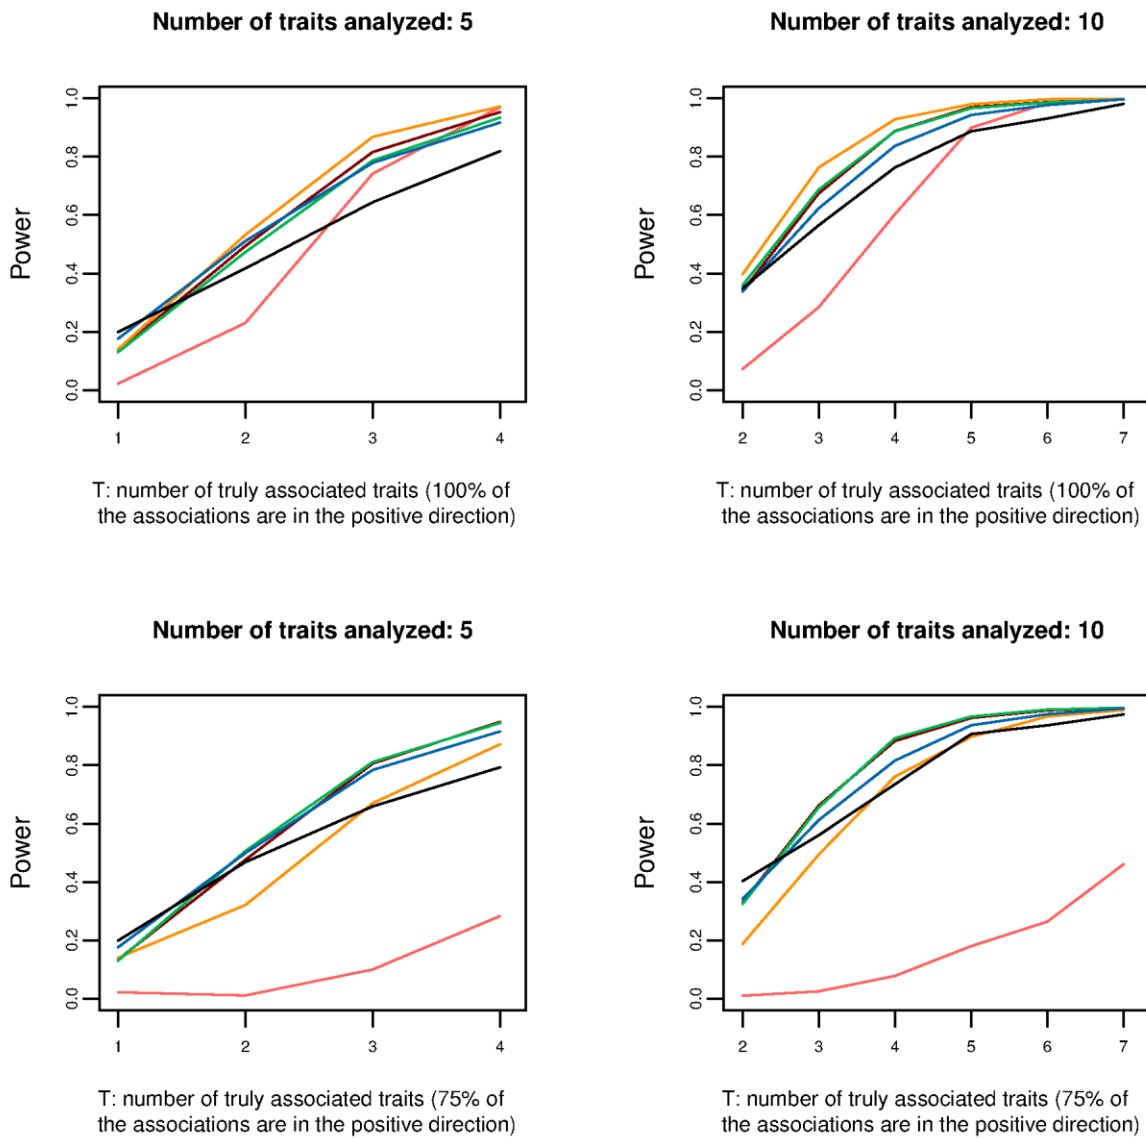

Figure S4. Simulation-Based Power Comparison of Alternative Methods for Detecting an Overall Association with Homogeneous Effect Sizes

In each simulation, a total of  $K=5$  or  $K=10$  distinct traits are analyzed, each with 2000 cases and 2000 controls. A variant with  $MAF=0.3$  is assumed to be associated with a subset of the traits (the number of such traits is shown on the x-axis). The OR-s for associated traits are fixed at a single value (1.15) (as in Figure 1). The upper panel assumes that all of the associations are in the same direction and the lower panel assumes that 75% of the associations are positive and 25% are negative. In addition to two-sided (green lines) and one-sided (orange lines) subset-based tests, power curves are shown for standard meta-analysis (red lines), Fisher's combined p-value method – a multi degree-of-freedom chi-square test (maroon line), the Adaptive Rank Trunkated Product (ARTP) test with  $K$  truncation points (black line) and the Adaptively Weighted (AW) statistic (blue line). All powers were calculated using empirical (simulation-based) cutoff at level 0.001.

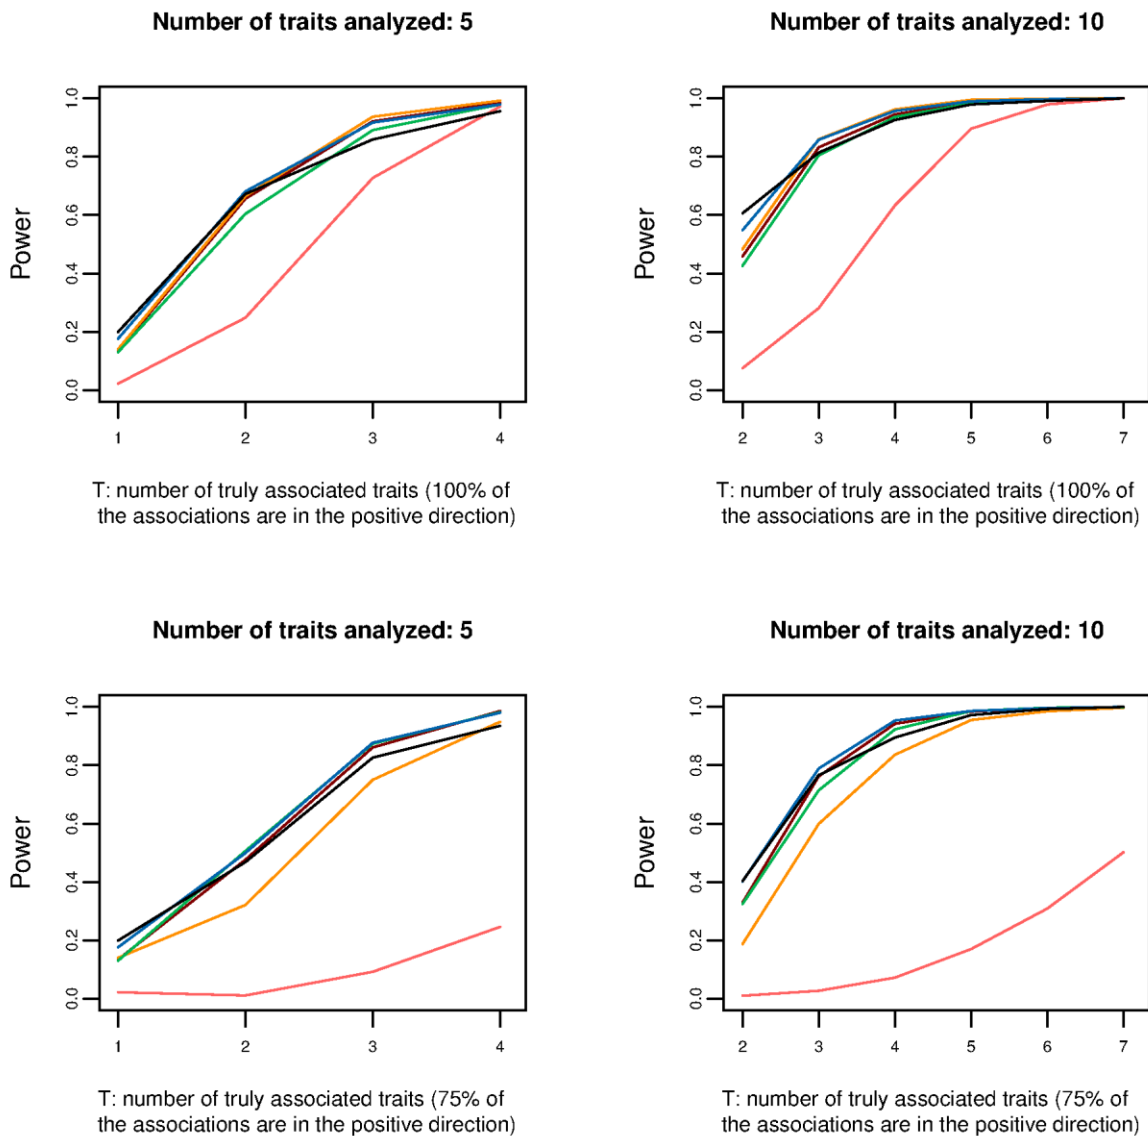

Figure S5. Simulation-Based Power Comparison of Alternative Methods for Detecting an Overall Association with Heterogeneous Effect Sizes

In each simulation, a total of  $K=5$  or  $K=10$  distinct traits are analyzed, each with 2000 cases and 2000 controls. A variant with  $MAF=0.3$  is assumed to be associated with a subset of the traits (the number of such traits is shown on the x-axis). The OR-s for associated traits are allowed to vary around a fixed mean (1.15) within a given range (1.05-1.25; see Supplemental Methods, section 6 for details). The upper panel assumes that all of the associations are in the same direction and the lower panel assumes that 75% of the associations are positive and 25% are negative. In addition to two-sided (green lines) and one-sided (orange lines) subset-based tests, power curves are shown for standard meta-analysis (red lines), Fisher's combined p-value method – a multi degree-of-freedom chi-square test (maroon line), the Adaptive Rank Truncated Product (ARTP) test with  $K$  truncation points (black line) and the Adaptively Weighted (AW) statistic (blue line). All powers were calculated using empirical (simulation-based) cutoff at level 0.001.

Table 1. Performance of the Subset-Based Test for Detection of the Truly Associated Subset of Traits in Presence of Heterogeneity of Odds Ratios

| (K, T <sub>1</sub> , T <sub>2</sub> ) | Sensitivity (True Positive Probability) |           | Specificity (True Negative Probability) |           |
|---------------------------------------|-----------------------------------------|-----------|-----------------------------------------|-----------|
|                                       | One-sided                               | Two-sided | One-sided                               | Two-sided |
| A. 5 studies                          |                                         |           |                                         |           |
| <b>100% positive</b>                  |                                         |           |                                         |           |
| (5, 1, 0)                             | 0.920                                   | 0.986     | 0.835                                   | 0.500     |
| (5, 2, 0)                             | 0.754                                   | 0.773     | 0.919                                   | 0.541     |
| (5, 3, 0)                             | 0.745                                   | 0.763     | 0.939                                   | 0.498     |
| (5, 4, 0)                             | 0.748                                   | 0.764     | 0.948                                   | 0.440     |
| <b>75% positive</b>                   |                                         |           |                                         |           |
| (5, 1, 1)                             | 0.502                                   | 0.982     | 0.883                                   | 0.721     |
| (5, 2, 1)                             | 0.495                                   | 0.829     | 0.931                                   | 0.775     |
| (5, 3, 1)                             | 0.547                                   | 0.807     | 0.946                                   | 0.800     |
| B. 10 studies                         |                                         |           |                                         |           |
| <b>100% positive</b>                  |                                         |           |                                         |           |
| (10, 2, 0)                            | 0.765                                   | 0.785     | 0.909                                   | 0.590     |
| (10, 3, 0)                            | 0.762                                   | 0.773     | 0.929                                   | 0.614     |
| (10, 4, 0)                            | 0.762                                   | 0.772     | 0.942                                   | 0.616     |
| (10, 5, 0)                            | 0.764                                   | 0.780     | 0.945                                   | 0.595     |
| (10, 6, 0)                            | 0.752                                   | 0.766     | 0.950                                   | 0.585     |
| (10, 7, 0)                            | 0.753                                   | 0.770     | 0.955                                   | 0.549     |
| <b>75% positive</b>                   |                                         |           |                                         |           |
| (10, 1, 1)                            | 0.500                                   | 0.978     | 0.855                                   | 0.675     |
| (10, 2, 1)                            | 0.502                                   | 0.838     | 0.907                                   | 0.739     |
| (10, 3, 1)                            | 0.558                                   | 0.818     | 0.930                                   | 0.768     |
| (10, 3, 2)                            | 0.454                                   | 0.772     | 0.944                                   | 0.839     |
| (10, 4, 2)                            | 0.501                                   | 0.760     | 0.947                                   | 0.854     |
| (10, 5, 2)                            | 0.539                                   | 0.765     | 0.951                                   | 0.868     |

In each simulation, a total of K=5 or K=10 distinct traits are analyzed, each with 2000 cases and 2000 controls. A variant with MAF=0.3 is assumed to be associated with a subset of size T (< K) traits with odds ratios varying within the range 1.05-1.25 with a mean value of 1.15 (see Methods for Details). For each K (i.e., 5 or 10 traits), Panel A assumes that all of the associations are in the same direction and Panel B assumes that 75% of the associations are positive and 25% are negative. Two measures of performance are shown; (1) sensitivity: the average proportion of associated traits detected and (2) specificity: the average proportion of null traits discarded.

§ K = Total number of traits analyzed (5 or 10).

T<sub>1</sub> = Number of traits that are truly associated in the positive direction.

T<sub>2</sub> = Number of traits that are truly associated in the negative direction.

Table S2. The Number of Cases and Controls and Their Overlaps<sup>†</sup> in the NCI GWAS Studies of Six Cancer Sites

| <b>Site</b>             | <b>BLADDER</b> | <b>BREAST</b> | <b>KIDNEY</b> | <b>LUNG</b> | <b>PANCREAS</b> | <b>PROSTATE</b> |
|-------------------------|----------------|---------------|---------------|-------------|-----------------|-----------------|
| <b>Cases Shared:</b>    |                |               |               |             |                 |                 |
| BLADDER                 | 3574           | 0             | 3             | 47          | 4               | 37              |
| BREAST                  | 0              | 1726          | 0             | 0           | 0               | 0               |
| KIDNEY                  | 3              | 0             | 2877          | 9           | 3               | 6               |
| LUNG                    | 47             | 0             | 9             | 5805        | 2               | 99              |
| PANCREAS                | 4              | 0             | 3             | 2           | 3954            | 14              |
| PROSTATE                | 37             | 0             | 6             | 99          | 14              | 3537            |
| <b>Controls Shared:</b> |                |               |               |             |                 |                 |
| BLADDER                 | 6200           | 63            | 8             | 2960        | 227             | 3609            |
| BREAST                  | 63             | 1472          | 0             | 189         | 0               | 0               |
| KIDNEY                  | 8              | 0             | 3754          | 5           | 0               | 4               |
| LUNG                    | 2960           | 189           | 5             | 5315        | 4               | 2378            |
| PANCREAS                | 227            | 0             | 0             | 4           | 4097            | 46              |
| PROSTATE                | 3609           | 0             | 4             | 2378        | 46              | 5053            |

There were a total of 21,473 cases and 25,891 controls.

<sup>†</sup> Numbers along the diagonals equal total sample size for that study. Numbers outside the diagonal represent shared cases (upper panel) and shared controls (lower panel).



Table S3. Details of the 18 GliomaScan Studies Included in the Glioma Subtype Analysis Example

| Study                                                        | Study Acronym | Study Type   | Control Selection                                                                     | Study Period (recruitment) | Location         | Cases | Controls | Mean age at diagnosis, cases (yrs) |
|--------------------------------------------------------------|---------------|--------------|---------------------------------------------------------------------------------------|----------------------------|------------------|-------|----------|------------------------------------|
| Agricultural Health Study                                    | AHS           | Cohort       | Frequency-matched 2:1 by year of birth, sex, race                                     | 1993-1997                  | USA (IA, NC)     | 18    | 35       | 57.2                               |
| Alpha-Tocopherol Beta-Carotene Cancer Prevention Study       | ATBC          | Cohort       | Glioma-free controls with previous GWAS data                                          | 1985-1993                  | Finland          | 37    | 1,270    | 69.3                               |
| Campaign Against Cancer and Stroke; Cancer and Heart Disease | §CLUE -I & II | Cohort       | Glioma-free controls with previous GWAS data                                          | 1974-1989                  | USA (MD)         | 36    | 71       | 65.0                               |
| Cancer Prevention Study II Nutrition Cohort                  | CPS-II        | Cohort       | Glioma-free controls with previous GWAS data                                          | 1992                       | USA (21 states)  | 54    | 98       | 73.0                               |
| Gliogene (Sweden)                                            | GLIOGENE      | Family       | Glioma-free controls from Sweden                                                      | 2004 - present             | Sweden           | 401   | 712      | 54.2                               |
| Health Professionals Follow-up Study                         | HPFS          | Cohort       | Glioma-free controls with previous GWAS data                                          | 1986 - ongoing             | USA              | 26    | 52       | 68.1                               |
| Interphone Study (Sweden, Denmark)                           | INT-SD        | Case-control | Matched on year of birth, sex, study region                                           | 2000-2004                  | Sweden, Denmark  | 277   | 381      | 49.5                               |
| Melbourne Collaborative Cohort Study                         | MCCS          | Cohort       | Glioma-free controls with previous GWAS data                                          | 1990-1994                  | Australia        | 40    | 75       | 68.0                               |
| Multiethnic Cohort                                           | MEC           | Cohort       | Matched on age, sex, race                                                             | Age 45-75 in 1993          | US               | 2     | 6        | 73.5                               |
| National Cancer Institute Adult Brain Study                  | NCI-BTS       | Case-control | Frequency-matched 2:1 by hospital, age, sex, race, residential distance from hospital | 1994-1998                  | USA (AZ, MA, PA) | 322   | 385      | 51.5                               |

|                                                                                    |             |              |                                                                      |                          |                      |     |     |      |
|------------------------------------------------------------------------------------|-------------|--------------|----------------------------------------------------------------------|--------------------------|----------------------|-----|-----|------|
| Upper Midwest Health Study - National Institute for Occupational Safety and Health | †NIOSH-UMHS | Case-control | Population-based controls frequency matched 1:5:1 by age, sex, state | 1995-1997                | USA (IA, MI, MN, WI) | 300 | 542 | 48.7 |
| New York University - Women's Health Study                                         | NYUWHS      | Cohort       | Glioma-free controls with previous GWAS data                         | 1985 - 1991              | USA (NY)             | 5   | 12  | 65.4 |
| Northern Sweden Health and Disease Study                                           | NSHDS       | Cohort       | Matched on age, sex, race                                            | 1985 - ongoing           | Northern Sweden      | 111 | 222 | 52.1 |
| Nurses' Health Study I and II                                                      | NHS         | Cohort       | Glioma-free controls with previous GWAS data                         | 1976, 1989               | USA (several states) | 38  | 83  | 66.9 |
| Physician's Health Study I and II                                                  | PHS         | Cohort       | Glioma-free controls with previous GWAS data                         | 1982 – 1984, 1997 – 2001 | USA (several states) | 16  | 54  | 71.1 |
| Prostate, Lung, Colorectal and Ovarian Screening Trial                             | PLCO        | Cohort       | Glioma-free controls with previous GWAS data                         | 1992-2001                | USA (several states) | 132 | 855 | 71.2 |
| Vitamins and Lifestyle                                                             | VITAL       | Cohort       | Matched on age, sex, race, time to diagnosis                         | 2000-2002                | USA (WA)             | 33  | 71  | 68.5 |
| Women's Health Study                                                               | WHS         | Cohort       | Glioma-free controls with previous GWAS data                         | 1991-2009                | USA (several states) | 8   | 31  | 58.3 |

There were a total of 1,856 cases and 4,955 controls.

§ Cancer incidence data for the CLUE study have been provided by the Maryland Cancer Registry. We acknowledge the State of Maryland, the Maryland Cigarette Restitution Fund, and the National Program of Cancer Registries of the Centers for Disease Control and Prevention for the funds that helped support the availability of the cancer registry data.

† The findings and conclusions in this report are those of the author(s) and do not necessarily represent the views of the National Institute for Occupational Safety and Health.

Table 4. Simulation-Based Estimates of Type I Error for Combined Analysis of Heterogenous Traits

| (N, K) <sup>§</sup> | Meta Analysis | Subset-based |           |
|---------------------|---------------|--------------|-----------|
|                     |               | One-sided    | Two-sided |
| <b>Level 0.05</b>   |               |              |           |
| (2000, 5)           | 0.0480        | 0.0570       | 0.0430    |
| (2000, 10)          | 0.0420        | 0.0310       | 0.0300    |
| <b>Level 0.01</b>   |               |              |           |
| (2000, 5)           | 0.0106        | 0.0096       | 0.0078    |
| (2000, 10)          | 0.0114        | 0.0088       | 0.0064    |
| <b>Level 0.001</b>  |               |              |           |
| (2000, 5)           | 0.0010        | 0.0010       | 0.0010    |
| (2000, 10)          | 0.0011        | 0.0009       | 0.0009    |

In each simulation, a total of K=5 or K=10 distinct traits are analyzed, each with N=2000 cases and N=2000 controls. A variant with MAF=0.3 unrelated to all the traits is tested for association in each case. Type I errors are shown for the standard meta-analysis and the proposed one-sided and two-sided methods based on subset search, at three different nominal significance levels.

§ N = Number of cases from each study corresponding to a single trait (fixed at 2000).  
 K = Total number of traits analyzed (either 5 or 10).

Table S5. Simulation-Based Estimates of Type I Error for the Analysis of a Case-Control Study with Geterogeneous Disease Subtypes

| (N, K, N <sub>0</sub> ) | Overall Case-control | Subset-based Test |                 |
|-------------------------|----------------------|-------------------|-----------------|
|                         |                      | Case-control      | Case-complement |
| <b>Level 0.05</b>       |                      |                   |                 |
| A. (2000, 7, 14000)     | 0.046                | 0.037             | 0.047           |
| B. (2000, 7, 3000)      | 0.046                | 0.036             | 0.040           |
| <b>Level 0.01</b>       |                      |                   |                 |
| A. (2000, 7, 14000)     | 0.0114               | 0.0084            | 0.0102          |
| B. (2000, 7, 3000)      | 0.0112               | 0.0094            | 0.0086          |
| <b>Level 0.001</b>      |                      |                   |                 |
| A. (2000, 7, 14000)     | 0.00108              | 0.00088           | 0.00082         |
| B. (2000, 7, 3000)      | 0.00086              | 0.00076           | 0.00092         |

Each simulation includes N=2000 cases for each of K=7 subtypes. Rows labeled A and B correspond to designs with N<sub>0</sub>=14000 and N<sub>0</sub>=3000 shared controls respectively. A variant with MAF=0.3 unrelated to all disease subtypes is tested for association in each case. Type I errors are shown for an overall case-control analysis and the two alternative subset-based tests, namely “Case-control” and “Case-complement,” at three different nominal significance levels.

- § N = Number of cases from corresponding to each disease subtype (fixed at 2000).  
 K = Total number of traits analyzed (fixed at 7).  
 N<sub>0</sub> = Number of controls available (either 14000 or 3000).

## The GliomaScan Consortium Investigators<sup>†</sup>

Demetrius Albanes<sup>1</sup>, Ulrika Andersson<sup>2</sup>, Laura Beane-Freeman<sup>3</sup>, Christine D. Berg<sup>4</sup>, Julie E. Buring<sup>5</sup>, Mary Ann Butler<sup>6</sup>, Tania Carreon<sup>6</sup>, Helle Collatz Christensen<sup>7</sup>, Maria Feychting<sup>8</sup>, Susan M. Gapstur<sup>9</sup>, J. Michael Gaziano<sup>10,11</sup>, Graham G. Giles<sup>12, 23</sup>, Goran Hallmans<sup>13</sup>, Susan E. Hankinson<sup>14</sup>, Roger Henriksson<sup>15,27</sup>, Jane Hoppin<sup>16</sup>, Ann W. Hsing<sup>17</sup>, Peter D. Inskip<sup>18</sup>, Christoffer Johansen<sup>7</sup>, Laurence N. Kolonel<sup>19</sup>, Roberta McKean-Cowdin<sup>20</sup>, Dominique Michaud<sup>21</sup>, Ulrike Peters<sup>22,26</sup>, Mark P. Purdue<sup>3</sup>, Avima M. Ruder<sup>6</sup>, Howard D. Sesso<sup>10</sup>, Gianluca Severi<sup>12,23</sup>, Victoria L. Stevens<sup>9</sup>, Kala Visvanathan<sup>24,25</sup>, Zhaoming Wang<sup>27</sup>, Emily White<sup>22,26</sup>, Walter C. Willett<sup>28</sup>, Anne Zeleniuch-Jacquotte<sup>29</sup>

<sup>1</sup> Nutritional Epidemiology Branch, Division of Cancer Epidemiology and Genetics, National Cancer Institute, Rockville, MD, USA

<sup>2</sup> Department of Radiation Sciences, Oncology, Umeå University, 90187 Umeå, Sweden

<sup>3</sup> Occupational and Environmental Epidemiology Branch, Division of Cancer Epidemiology and Genetics, National Cancer Institute, Rockville, MD, USA

<sup>4</sup> Early Detection Research Group, Division of Cancer Prevention, National Cancer Institute, Bethesda, MD 20852, USA

<sup>5</sup> Division of Preventive Medicine, Brigham and Women's Hospital, Harvard Medical School, Boston, MA 02215, USA

<sup>6</sup> National Institute for Occupational Safety and Health, Centers for Disease Control and Prevention, Cincinnati, Ohio, USA

<sup>7</sup> Institute of Cancer Epidemiology, Danish Cancer Society, DK-2100 Copenhagen, Denmark

<sup>8</sup> Institute of Environmental Medicine, Karolinska Institutet, Stockholm, Sweden

<sup>9</sup> Epidemiology Research Program, American Cancer Society, Atlanta, GA, USA

<sup>10</sup> Divisions of Preventive Medicine and Aging, Brigham and Women's Hospital, Harvard Medical School, Boston, MA 02215, USA

<sup>11</sup> Massachusetts Veteran's Epidemiology, Research and Information Center, Geriatric Research Education and Clinical Center, VA Boston Healthcare System, Boston, Massachusetts, United States of America

<sup>12</sup> Cancer Epidemiology Centre, The Cancer Council of Victoria, Melbourne, Australia

<sup>13</sup> Department of Public Health and Clinical Medicine/Nutritional Research, Umea University

<sup>14</sup> Channing Laboratory, Brigham and Women's Hospital, Harvard Medical School, Boston, MA 02215, USA

<sup>15</sup> Dept Oncology, Karolinska University hospital, Stockholm

<sup>16</sup> National Institute of Environmental Health Sciences, NIH, Research Triangle Park, NC, USA

<sup>17</sup> Infections and Immunoepidemiology Branch, Division of Cancer Epidemiology and Genetics, National Cancer Institute, Rockville, MD, USA

<sup>18</sup> Radiation Epidemiology Epidemiology Branch, Division of Cancer Epidemiology and Genetics, National Cancer Institute, Rockville, MD, USA

<sup>19</sup> Epidemiology Program, Cancer Research Center, University of Hawaii, Honolulu, Hawaii, USA

<sup>20</sup> Department of Preventive Medicine, Keck School of Medicine, University of Southern California, Los Angeles, CA, USA

<sup>21</sup> Department of Community Health, Brown University, Providence, RI, USA

<sup>22</sup> Fred Hutchinson Cancer Research Center, Seattle, WA 98109, USA

<sup>23</sup> Centre for Molecular, Environmental, Genetic, and Analytic Epidemiology, The University of Melbourne, Melbourne, Australia

<sup>24</sup> Johns Hopkins Sidney Kimmel Comprehensive Cancer Center, Baltimore, MD, USA

<sup>25</sup> Johns Hopkins Bloomberg School of Public Health, Baltimore, MD, USA

<sup>26</sup> University of Washington, Department of Epidemiology; Seattle, WA, USA

<sup>27</sup> Core Genotyping Facility, National Cancer Institute, SAIC-Frederick, Inc., Gaithersburg, Maryland 20877, USA

<sup>28</sup> Departments of Nutrition and Epidemiology, Harvard School of Public Health, Boston, MA 02115, USA

<sup>29</sup> Division of Epidemiology, Department of Environmental Medicine, NYU School of Medicine, New York, NY 10016, USA

†Investigator names appear in alphabetical order.
